# Supplementary material for: New Photomagnetic Ionic Salts Based on [MoIV(CN)8]4− and [WIV(CN)8]4− Anions
Source: MDPI journal article supplement (doi:10.3390/magnetochemistry7070097), 2021-07-06
Supplement: s1 [file s1]

# Supplementary Materials: New photomagnetic ionic salts based on $[\text{Mo}^{\text{IV}}(\text{CN})_8]^{4-}$ and $[\text{W}^{\text{IV}}(\text{CN})_8]^{4-}$ anions

Xinghui Qi <sup>1</sup>, Philippe Guionneau <sup>1,\*</sup>, Enzo Lafon <sup>1</sup>, Solène Perot <sup>1</sup>, Brice Kauffmann <sup>2</sup> and Corine Mathonière <sup>1,3,\*</sup>

<sup>1</sup> Université de Bordeaux, CNRS, Bordeaux INP, ICMCB, UMR 5026, F-33600 Pessac, France; xinghui.qi@icmcb.cnrs.fr (X.Q.); enzo.lafon@etu.u-bordeaux.fr (E.L.); solene.perot@etu.u-bordeaux.fr (S.P.)

<sup>2</sup> Université de Bordeaux, IECB, UMS 3033, Institut Européen de Chimie et Biologie, 2 rue Escarpite, 33600 Pessac, France; b.kauffmann@iecb.u-bordeaux.fr

<sup>3</sup> Université de Bordeaux, CNRS, Centre de Recherche Paul Pascal, UMR 5031, F-33600 Pessac, France

\* Correspondence: philippe.guionneau@icmcb.cnrs.fr (P.G.); corine.mathoniere@u-bordeaux.fr (C.M.)

† Dedicated to Professor Peter Day, this article belongs to the Special Issue—Perspectives on Molecular Materials—A Tribute to Professor Peter Day.

## I. IR spectra

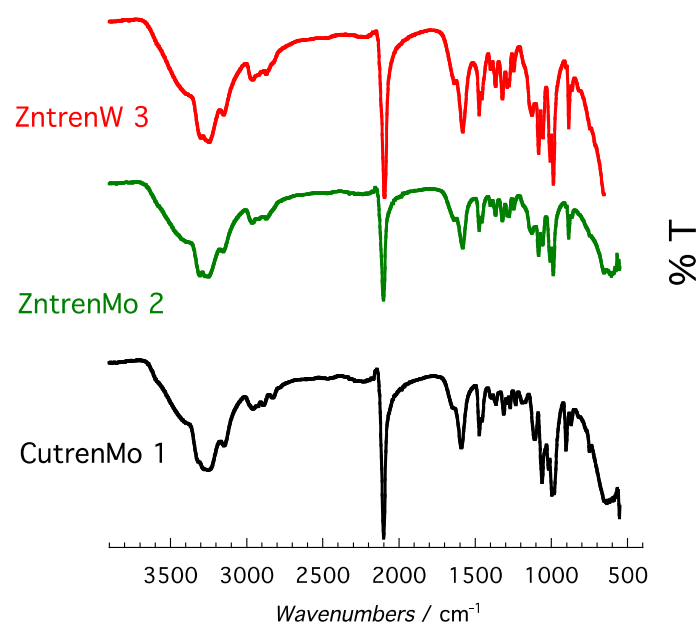

Figure S1. FT-IR spectra of 1, 2 and 3.

Table S1. Possible attributions of IR vibrations according to the literature.<sup>1</sup>

| Region                                          | Assignment                                                                                                                                                 |
|-------------------------------------------------|------------------------------------------------------------------------------------------------------------------------------------------------------------|
| Broad peaks in the 3700 – 3000 cm <sup>-1</sup> | $\nu(\text{O-H})$ stretching bands of water molecules                                                                                                      |
| Sharp peaks in the 3000 – 2750 cm <sup>-1</sup> | $\nu(\text{C-H})$ and $\nu(\text{N-H})$ vibrations of the tren ligand                                                                                      |
| 2200 – 2100 cm <sup>-1</sup>                    | Stretching bands $\nu(\text{C}\equiv\text{N})$ of cyanide group                                                                                            |
| 1700 – 600 cm <sup>-1</sup>                     | $\delta(\text{O-H})$ bending bands of water and several other bands from the tren ligand: $\delta(\text{H-C-H})$ , $\nu(\text{N-C})$ and $\nu(\text{C-C})$ |

Table S2. Summary of CN stretching bands observed for 1, 2, 3 and their precursors used during their synthesis involved in this work.

| Compounds                                                                                         | CN stretching bands / cm <sup>-1</sup> |
|---------------------------------------------------------------------------------------------------|----------------------------------------|
| K <sub>4</sub> Mo(CN) <sub>8</sub> ·2H <sub>2</sub> O                                             | 2160, 2123, 2100, 2059                 |
| [{Cu(tren)} <sub>3</sub> ( $\mu$ -tren)] <sub>4</sub> [Mo(CN) <sub>8</sub> ] <sub>6</sub> ·solv 1 | 2098                                   |
| [{Zn(tren)} <sub>3</sub> ( $\mu$ -tren)] <sub>2</sub> [Mo(CN) <sub>8</sub> ] <sub>3</sub> ·solv 2 | 2098                                   |
| K <sub>4</sub> W(CN) <sub>8</sub> ·2H <sub>2</sub> O                                              | 2168, 2125, 2093, 2056                 |
| [{Zn(tren)} <sub>3</sub> ( $\mu$ -tren)] <sub>2</sub> [W(CN) <sub>8</sub> ] <sub>3</sub> ·solv 3  | 2091                                   |

## II. UV-Visible Spectra

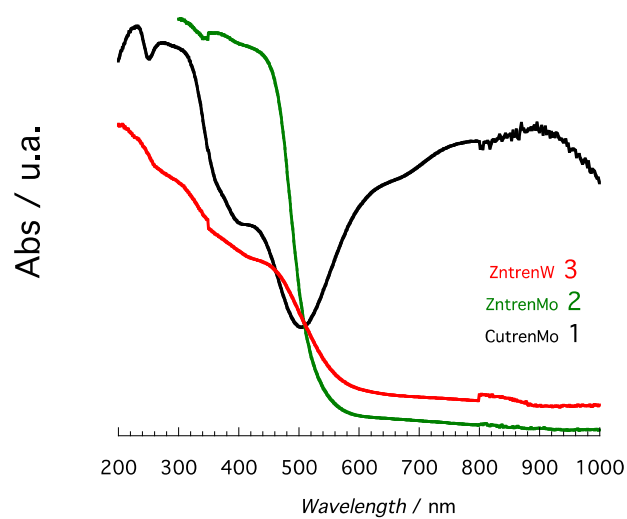

**Figure S2.** : Solid State UV-Visible spectra of **1**, **2** and **3**.

**Table S3.** Optical absorptions observed in **1**, **2**, **3**, their precursors and reported  $[\text{Cu}(\text{tren})(\text{NH}_3)][\text{ClO}_4]_2$ .

| Compounds                                                                                                   | $\lambda$ / nm                              |
|-------------------------------------------------------------------------------------------------------------|---------------------------------------------|
| $\text{K}_4\text{Mo}(\text{CN})_8 \cdot 2\text{H}_2\text{O}^2$                                              | 430, 368, 308 (Mo ligand field transitions) |
| $[\text{Cu}(\text{tren})(\text{NH}_3)][\text{ClO}_4]_2^3$                                                   | 872, 643                                    |
| $[\{\text{Cu}(\text{tren})\}_3(\mu\text{-tren})_4[\text{Mo}(\text{CN})_8]_6 \cdot \text{solv } \mathbf{1}]$ | 877, 657, 430, 306                          |
| $[\{\text{Zn}(\text{tren})\}_3(\mu\text{-tren})_2[\text{Mo}(\text{CN})_8]_3 \cdot \text{solv } \mathbf{2}]$ | 430, 356                                    |
| $\text{K}_4\text{W}(\text{CN})_8 \cdot 2\text{H}_2\text{O}^2$                                               | 435, 370, 303 (W ligand field transitions)  |
| $[\{\text{Zn}(\text{tren})\}_3(\mu\text{-tren})_2[\text{W}(\text{CN})_8]_3 \cdot \text{solv } \mathbf{3}]$  | 445, 300                                    |

## III. Additional crystallographic tables and figures

Table S4. Selected bond lengths and angles for  $[\text{Mo}^{\text{IV}}(\text{CN})_8]^{4-}$  anion in 1.

| Atoms   |     | Length/Å  | Atoms   |     | Length/Å  | Atoms   |     | Angle/°   |
|---------|-----|-----------|---------|-----|-----------|---------|-----|-----------|
| Mo1     | C1  | 2.166(10) | N1      | C1  | 1.176(15) | N1      | C1  | 177.8(9)  |
| Mo1     | C2  | 2.192(9)  | N2      | C2  | 1.143(14) | N2      | C2  | 174.4(10) |
| Mo1     | C3  | 2.187(8)  | N3      | C3  | 1.131(14) | N3      | C3  | 177.8(10) |
| Mo1     | C4  | 2.175(11) | N4      | C4  | 1.139(15) | N4      | C4  | 178.5(9)  |
| Mo1     | C5  | 2.185(9)  | N5      | C5  | 1.139(14) | N5      | C5  | 175.7(9)  |
| Mo1     | C6  | 2.165(11) | N6      | C6  | 1.153(14) | N6      | C6  | 177.0(10) |
| Mo1     | C7  | 2.185(9)  | N7      | C7  | 1.131(14) | N7      | C7  | 178.4(9)  |
| Mo1     | C8  | 2.178(9)  | N8      | C8  | 1.145(14) | N8      | C8  | 176.7(10) |
| Average |     | 2.179(10) | Average |     | 1.145(14) | Average |     | 177.0(10) |
| Mo2     | C9  | 2.178(10) | N9      | C9  | 1.118(15) | N9      | C9  | 177.5(11) |
| Mo2     | C10 | 2.169(10) | N10     | C10 | 1.140(14) | N10     | C10 | 179.0(9)  |
| Mo2     | C11 | 2.158(10) | N11     | C11 | 1.153(14) | N11     | C11 | 175.4(8)  |
| Mo2     | C12 | 2.169(9)  | N12     | C12 | 1.137(13) | N12     | C12 | 176.2(9)  |
| Mo2     | C13 | 2.173(9)  | N13     | C13 | 1.147(13) | N13     | C13 | 177.1(10) |
| Mo2     | C14 | 2.154(10) | N14     | C14 | 1.152(16) | N14     | C14 | 177.8(11) |
| Mo2     | C15 | 2.194(9)  | N15     | C15 | 1.138(14) | N15     | C15 | 174.9(9)  |
| Mo2     | C16 | 2.165(9)  | N16     | C16 | 1.145(14) | N16     | C16 | 175.7(9)  |
| Average |     | 2.170(10) | Average |     | 1.141(14) | Average |     | 176.7(10) |
| Mo3     | C17 | 2.196(14) | C17     | N17 | 1.11(2)   | N17     | C17 | 177.6(14) |
| Mo3     | C18 | 2.184(13) | C18     | N18 | 1.14(2)   | N18     | C18 | 176.0(14) |
| Mo3     | C19 | 2.169(13) | N19     | C19 | 1.107(18) | N19     | C19 | 177.2(13) |
| Mo3     | C20 | 2.186(14) | N20     | C20 | 1.12(2)   | N20     | C20 | 177.1(15) |
| Mo3     | C21 | 2.173(16) | C21     | N21 | 1.11(2)   | N21     | C21 | 175.4(19) |
| Mo3     | C22 | 2.166(14) | N22     | C22 | 1.17(2)   | N22     | C22 | 173(2)    |
| Mo3     | C23 | 2.153(14) | N23     | C23 | 1.194(19) | N23     | C23 | 177.7(14) |
| Mo3     | C24 | 2.177(15) | C24     | N24 | 1.13(2)   | N24     | C24 | 173(2)    |
| Average |     | 2.176(14) | Average |     | 1.135(6)  | Average |     | 175.9(12) |
| Mo4     | C25 | 2.147(13) | C25     | N25 | 1.162(18) | N25     | C25 | 176.2(11) |
| Mo4     | C26 | 2.204(10) | N26     | C26 | 1.121(14) | N26     | C26 | 174.8(9)  |
| Mo4     | C27 | 2.176(9)  | N27     | C27 | 1.154(14) | N27     | C27 | 178.0(9)  |
| Mo4     | C28 | 2.163(10) | N28     | C28 | 1.152(14) | N28     | C28 | 178.4(9)  |
| Mo4     | C29 | 2.174(10) | N29     | C29 | 1.136(14) | N29     | C29 | 179.1(10) |
| Mo4     | C30 | 2.161(8)  | N30     | C30 | 1.145(14) | N30     | C30 | 179.7(10) |
| Mo4     | C31 | 2.196(14) | C31     | N31 | 1.11(2)   | N31     | C31 | 178(2)    |
| Mo4     | C32 | 2.198(9)  | N32     | C32 | 1.119(15) | N32     | C32 | 175.7(12) |
| Average |     | 2.177(10) | Average |     | 1.137(13) | Average |     | 177.5(9)  |
| Mo5     | C33 | 2.137(14) | C33     | N33 | 1.18(2)   | N33     | C33 | 175.5(18) |
| Mo5     | C34 | 2.160(14) | N34     | C34 | 1.16(2)   | N34     | C34 | 177.7(15) |
| Mo5     | C35 | 2.127(11) | N35     | C35 | 1.170(17) | N35     | C35 | 178.0(13) |
| Mo5     | C36 | 2.176(12) | N36     | C36 | 1.122(17) | N36     | C36 | 176.6(14) |
| Mo5     | C37 | 2.114(14) | N37     | C37 | 1.181(18) | N37     | C37 | 177.0(10) |
| Mo5     | C38 | 2.194(13) | N38     | C38 | 1.13(2)   | N38     | C38 | 177.8(15) |
| Mo5     | C39 | 2.172(10) | N39     | C39 | 1.162(17) | N39     | C39 | 178.5(13) |
| Mo5     | C40 | 2.144(13) | C40     | N40 | 1.15(2)   | N40     | C40 | 173(3)    |
| Average |     | 2.153(13) | Average |     | 1.157(10) | Average |     | 176.8(13) |
| Mo6     | C41 | 2.175(10) | N41     | C41 | 1.134(14) | N41     | C41 | 177.8(11) |
| Mo6     | C42 | 2.160(10) | C42     | N42 | 1.149(16) | N42     | C42 | 178.6(13) |
| Mo6     | C43 | 2.172(9)  | N43     | C43 | 1.129(14) | N43     | C43 | 176.3(9)  |
| Mo6     | C44 | 2.172(10) | N44     | C44 | 1.146(13) | N44     | C44 | 174.9(9)  |
| Mo6     | C45 | 2.174(9)  | N45     | C45 | 1.134(14) | N45     | C45 | 179.2(11) |
| Mo6     | C46 | 2.176(11) | N46     | C46 | 1.131(15) | N46     | C46 | 178.2(10) |
| Mo6     | C47 | 2.154(10) | N47     | C47 | 1.140(14) | N47     | C47 | 175.7(8)  |
| Mo6     | C48 | 2.170(10) | N48     | C48 | 1.138(14) | N48     | C48 | 177.7(9)  |
| Average |     | 2.169(10) | Average |     | 1.138(14) | Average |     | 177.3(10) |

**Table S5.** Selected bond lengths and angles for  $[\text{Mo}^{\text{IV}}(\text{CN})_8]^{4-}$  anion in **2**.

| Atoms   |     | Length/Å   | Atoms   |     | Length/Å  | Atoms   |     | Angle/°   |
|---------|-----|------------|---------|-----|-----------|---------|-----|-----------|
| Mo1     | C1  | 2.168(14)  | N1      | C1  | 1.164(19) | N1      | C1  | 176.6(12) |
| Mo1     | C2  | 2.180(11)  | N2      | C2  | 1.112(16) | N2      | C2  | 176.2(13) |
| Mo1     | C3  | 2.181(13)  | N3      | C3  | 1.129(18) | N3      | C3  | 175.2(13) |
| Mo1     | C4  | 2.178(16)  | N4      | C4  | 1.14(2)   | N4      | C4  | 175.2(16) |
| Mo1     | C5  | 2.157(12)  | N5      | C5  | 1.136(17) | N5      | C5  | 179.8(16) |
| Mo1     | C6  | 2.206(14)  | N6      | C6  | 1.11(2)   | N6      | C6  | 178(2)    |
| Mo1     | C7  | 2.175(12)  | N7      | C7  | 1.144(17) | N7      | C7  | 178.7(12) |
| Mo1     | C8  | 2.144(13)  | N8      | C8  | 1.18(2)   | N8      | C8  | 176.6(15) |
| Average |     | 2.174 (13) | Average |     | 1.139(12) | Average |     | 177.0(12) |
| Mo2     | C9  | 2.153(13)  | N9      | C9  | 1.150(18) | N9      | C9  | 177.1(11) |
| Mo2     | C10 | 2.199(9)   | N10     | C10 | 1.126(16) | N10     | C10 | 177.2(13) |
| Mo2     | C11 | 2.146(14)  | N11     | C11 | 1.14(2)   | N11     | C11 | 178.8(17) |
| Mo2     | C12 | 2.200(10)  | N12     | C12 | 1.156(19) | N12     | C12 | 178.9(16) |
| Mo2     | C13 | 2.147(14)  | N13     | C13 | 1.18(2)   | N13     | C13 | 177.9(18) |
| Mo2     | C14 | 2.160(12)  | N14     | C14 | 1.148(19) | N14     | C14 | 176.9(14) |
| Mo2     | C15 | 2.187(12)  | N15     | C15 | 1.116(19) | N15     | C15 | 178.2(14) |
| Mo2     | C16 | 2.133(14)  | N16     | C16 | 1.18(2)   | N16     | C16 | 176.3(17) |
| Average |     | 2.166(12)  | Average |     | 1.150(12) | Average |     | 177.7(15) |
| Mo3     | C17 | 2.164(12)  | N17     | C17 | 1.177(19) | N17     | C17 | 175.8(13) |
| Mo3     | C18 | 2.176(16)  | N18     | C18 | 1.13(2)   | N18     | C18 | 178.1(14) |
| Mo3     | C19 | 2.178(13)  | N19     | C19 | 1.128(19) | N19     | C19 | 175.0(14) |
| Mo3     | C20 | 2.146(14)  | N20     | C20 | 1.151(19) | N20     | C20 | 178.3(13) |
| Mo3     | C21 | 2.21(2)    | N21     | C21 | 1.10(3)   | N21     | C21 | 176(2)    |
| Mo3     | C22 | 2.216(12)  | N22     | C22 | 1.075(19) | N22     | C22 | 177.9(19) |
| Mo3     | C23 | 2.160(14)  | N23     | C23 | 1.20(2)   | N23     | C23 | 174.2(13) |
| Mo3     | C24 | 2.178(12)  | N24     | C24 | 1.095(19) | N24     | C24 | 177.6(14) |
| Average |     | 2.179(12)  | Average |     | 1.132(12) | Average |     | 176.6(13) |

**Table S6.** Selected bond lengths and angles for  $[\text{W}^{\text{IV}}(\text{CN})_8]^{4-}$  anions in **3**.

| Atoms   |     | Length/Å  | Atoms   |     | Length/Å  | Atoms   |     | Angle/°   |
|---------|-----|-----------|---------|-----|-----------|---------|-----|-----------|
| W1      | C1  | 2.144(11) | N1      | C1  | 1.158(14) | N1      | C1  | 177.8(10) |
| W1      | C7  | 2.166(11) | N7      | C7  | 1.139(13) | N7      | C7  | 177.7(9)  |
| W1      | C6  | 2.150(11) | N6      | C6  | 1.167(14) | N6      | C6  | 177.7(10) |
| W1      | C2  | 2.172(12) | N2      | C2  | 1.154(14) | N2      | C2  | 179.1(10) |
| W1      | C3  | 2.161(11) | C3      | N3  | 1.137(14) | N3      | C3  | 179.3(11) |
| W1      | C4  | 2.200(12) | N4      | C4  | 1.117(14) | N4      | C4  | 179.0(12) |
| W1      | C8  | 2.198(12) | N8      | C8  | 1.133(14) | N8      | C8  | 174.8(10) |
| W1      | C5  | 2.155(13) | N5      | C5  | 1.155(15) | N5      | C5  | 175.8(14) |
| Average |     | 2.168(12) | Average |     | 1.145(14) | Average |     | 177.7(11) |
| W2      | C10 | 2.151(11) | C10     | N10 | 1.134(13) | N10     | C10 | 178.3(9)  |
| W2      | C9  | 2.162(11) | N9      | C9  | 1.146(13) | N9      | C9  | 178.0(10) |
| W2      | C13 | 2.176(12) | N13     | C13 | 1.153(14) | N13     | C13 | 175.3(9)  |
| W2      | C15 | 2.149(12) | N15     | C15 | 1.169(14) | N15     | C15 | 176.4(9)  |
| W2      | C11 | 2.143(11) | N11     | C11 | 1.163(13) | N11     | C11 | 178.0(11) |
| W2      | C16 | 2.179(12) | N16     | C16 | 1.151(13) | N16     | C16 | 175.3(10) |
| W2      | C14 | 2.168(12) | C14     | N14 | 1.163(14) | N14     | C14 | 178.8(11) |
| W2      | C12 | 2.192(11) | N12     | C12 | 1.143(14) | N12     | C12 | 178.3(10) |
| Average |     | 2.165(12) | Average |     | 1.153(14) | Average |     | 177.3(10) |
| W3      | C20 | 2.163(11) | C20     | N20 | 1.119(13) | N20     | C20 | 179.5(10) |
| W3      | C22 | 2.176(13) | N22     | C22 | 1.158(15) | N22     | C22 | 179.0(10) |
| W3      | C18 | 2.117(12) | C18     | N18 | 1.174(14) | N18     | C18 | 177.8(11) |
| W3      | C23 | 2.155(12) | N23     | C23 | 1.192(15) | N23     | C23 | 177.2(12) |
| W3      | C19 | 2.193(11) | N19     | C19 | 1.147(13) | N19     | C19 | 177.5(9)  |
| W3      | C21 | 2.202(13) | N21     | C21 | 1.113(14) | N21     | C21 | 177.3(11) |
| W3      | C17 | 2.179(12) | N17     | C17 | 1.144(14) | N17     | C17 | 179.6(12) |

|         |     |           |         |     |           |         |     |           |           |
|---------|-----|-----------|---------|-----|-----------|---------|-----|-----------|-----------|
| W3      | C24 | 2.188(13) | N24     | C24 | 1.127(15) | N24     | C24 | W3        | 178.0(12) |
| Average |     | 2.172(12) | Average |     | 1.147(14) | Average |     | 178.2(11) |           |

Table S7. Selected bond lengths for  $[\{\text{Cu}(\text{tren})\}_3(\mu\text{-tren})]^{6+}$  cation in 1.

| Atoms   |     | Length/Å  | Atoms   |     | Length/Å  | Atoms   |      | Length/Å  |
|---------|-----|-----------|---------|-----|-----------|---------|------|-----------|
| Cu1     | N64 | 2.045(8)  | Cu2     | N50 | 1.993(9)  | Cu3     | N55  | 2.022(9)  |
| Cu1     | N60 | 1.984(9)  | Cu2     | N54 | 2.068(12) | Cu3     | N57  | 2.148(9)  |
| Cu1     | N62 | 2.104(9)  | Cu2     | N52 | 2.129(11) | Cu3     | N56  | 2.046(9)  |
| Cu1     | N61 | 2.091(9)  | Cu2     | N51 | 2.059(11) | Cu3     | N59  | 2.082(10) |
| Cu1     | N63 | 2.120(8)  | Cu2     | N53 | 2.101(12) | Cu3     | N58  | 2.066(10) |
| Average |     | 2.069(9)  | Average |     | 2.070(11) | Average |      | 2.073(9)  |
| Cu4     | N66 | 2.020(9)  | Cu5     | N80 | 2.027(14) | Cu6     | N72  | 2.020(8)  |
| Cu4     | N75 | 2.082(9)  | Cu5     | N79 | 2.170(16) | Cu6     | N68  | 2.000(10) |
| Cu4     | N74 | 2.113(10) | Cu5     | N78 | 2.024(19) | Cu6     | N69  | 2.067(12) |
| Cu4     | N76 | 2.064(10) | Cu5     | N67 | 1.998(14) | Cu6     | N71  | 2.171(10) |
| Cu4     | N73 | 2.048(18) | Cu5     | N77 | 2.060(18) | Cu6     | N70  | 2.024(12) |
| Average |     | 2.065(11) | Average |     | 2.056(16) | Average |      | 2.056(10) |
| Cu7     | N10 | 2.034(8)  | Cu8     | N95 | 2.000(10) | Cu9     | N94  | 2.027(9)  |
| Cu7     | N98 | 2.099(10) | Cu8     | N10 | 2.076(10) | Cu9     | N108 | 2.096(9)  |
| Cu7     | N96 | 2.008(9)  | Cu8     | N10 | 2.117(10) | Cu9     | N107 | 2.136(11) |
| Cu7     | N97 | 2.105(9)  | Cu8     | N10 | 2.085(12) | Cu9     | N105 | 2.035(12) |
| Cu7     | N99 | 2.131(11) | Cu8     | N10 | 2.066(13) | Cu9     | N106 | 2.027(11) |
| Average |     | 2.075(9)  | Average |     | 2.069(11) | Average |      | 2.064(10) |
| Cu10    | N84 | 2.014(11) | Cu11    | N83 | 1.981(8)  | Cu12    | N82  | 2.000(10) |
| Cu10    | N11 | 2.049(10) | Cu11    | N85 | 2.116(8)  | Cu12    | N90  | 2.140(9)  |
| Cu10    | N11 | 2.076(12) | Cu11    | N86 | 2.104(10) | Cu12    | N92  | 2.076(10) |
| Cu10    | N10 | 2.117(16) | Cu11    | N88 | 2.048(9)  | Cu12    | N89  | 2.073(9)  |
| Cu10    | N11 | 2.093(14) | Cu11    | N87 | 2.081(16) | Cu12    | N91  | 2.058(13) |
| Average |     | 2.070(13) | Average |     | 2.066(10) | Average |      | 2.069(10) |

Table S8. Selected bond lengths for  $[\{\text{Zn}(\text{tren})\}_3(\mu\text{-tren})]^{6+}$  cation in 2.

| Atoms   |     | Length/Å  | Atoms   |     | Length/Å  | Atoms   |     | Length/Å  |
|---------|-----|-----------|---------|-----|-----------|---------|-----|-----------|
| Zn1     | N25 | 2.095(14) | Zn2     | N30 | 2.081(11) | Zn3     | N34 | 2.015(19) |
| Zn1     | N26 | 2.075(14) | Zn2     | N31 | 2.081(13) | Zn3     | N35 | 2.02(2)   |
| Zn1     | N27 | 2.084(11) | Zn2     | N32 | 2.065(13) | Zn3     | N36 | 2.055(16) |
| Zn1     | N28 | 2.294(12) | Zn2     | N33 | 2.119(10) | Zn3     | N37 | 2.272(16) |
| Zn1     | N29 | 2.101(11) | Zn2     | N39 | 2.315(13) | Zn3     | N40 | 2.193(19) |
| Average |     | 2.130(12) | Average |     | 2.132(12) | Average |     | 2.111(14) |
| Zn4     | N41 | 2.070(11) | Zn5     | N46 | 2.077(11) | Zn6     | N51 | 2.113(12) |
| Zn4     | N42 | 2.077(11) | Zn5     | N47 | 2.082(11) | Zn6     | N52 | 2.102(11) |
| Zn4     | N43 | 2.103(12) | Zn5     | N48 | 2.073(10) | Zn6     | N53 | 2.063(12) |
| Zn4     | N44 | 2.259(12) | Zn5     | N49 | 2.301(12) | Zn6     | N54 | 2.311(11) |
| Zn4     | N45 | 2.110(12) | Zn5     | N50 | 2.105(10) | Zn6     | N55 | 2.101(10) |
| Average |     | 2.124(12) | Average |     | 2.128(11) | Average |     | 2.138(11) |

Table S9. Selected bond lengths for  $[\{\text{Zn}(\text{tren})\}_3(\mu\text{-tren})]^{6+}$  cation in 3.

| Atoms   |     | Length/Å  | Atoms   |     | Length/Å | Atoms   |     | Length/Å |
|---------|-----|-----------|---------|-----|----------|---------|-----|----------|
| Zn1     | N28 | 2.113(8)  | Zn2     | N36 | 2.308(8) | Zn3     | N56 | 2.299(9) |
| Zn1     | N51 | 2.061(8)  | Zn2     | N33 | 2.081(9) | Zn3     | N54 | 2.083(9) |
| Zn1     | N49 | 2.081(8)  | Zn2     | N35 | 2.042(9) | Zn3     | N53 | 2.076(8) |
| Zn1     | N52 | 2.283(9)  | Zn2     | N27 | 2.080(8) | Zn3     | N26 | 2.110(8) |
| Zn1     | N50 | 2.080(9)  | Zn2     | N34 | 2.063(8) | Zn3     | N55 | 2.070(9) |
| Average |     | 2.124(8)  | Average |     | 2.115(8) | Average |     | 2.128(9) |
| Zn4     | N48 | 2.295(12) | Zn5     | N57 | 2.107(8) | Zn6     | N61 | 2.295(9) |
| Zn4     | N45 | 2.097(11) | Zn5     | N43 | 2.060(9) | Zn6     | N59 | 2.060(8) |
| Zn4     | N47 | 2.020(14) | Zn5     | N42 | 2.090(9) | Zn6     | N38 | 2.122(8) |

|         |     |           |         |     |           |         |     |           |
|---------|-----|-----------|---------|-----|-----------|---------|-----|-----------|
| Zn4     | N39 | 2.146(12) | Zn5     | N44 | 2.351(9)  | Zn6     | N58 | 2.034(10) |
| Zn4     | N46 | 2.028(13) | Zn5     | N41 | 2.067(10) | Zn6     | N60 | 2.095(10) |
| Average |     | 2.117(12) | Average |     | 2.135(9)  | Average |     | 2.121(9)  |

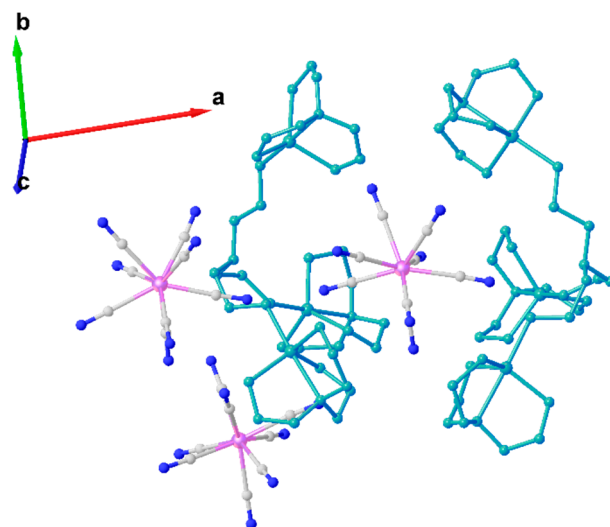

**Figure S3.** Asymmetric unit of **3** in *ab* plane with  $[\{Zn(tren)\}_3(\mu\text{-tren})]^{6+}$  units in green, with *a*, *b*, *c* indicating crystallographic axes.

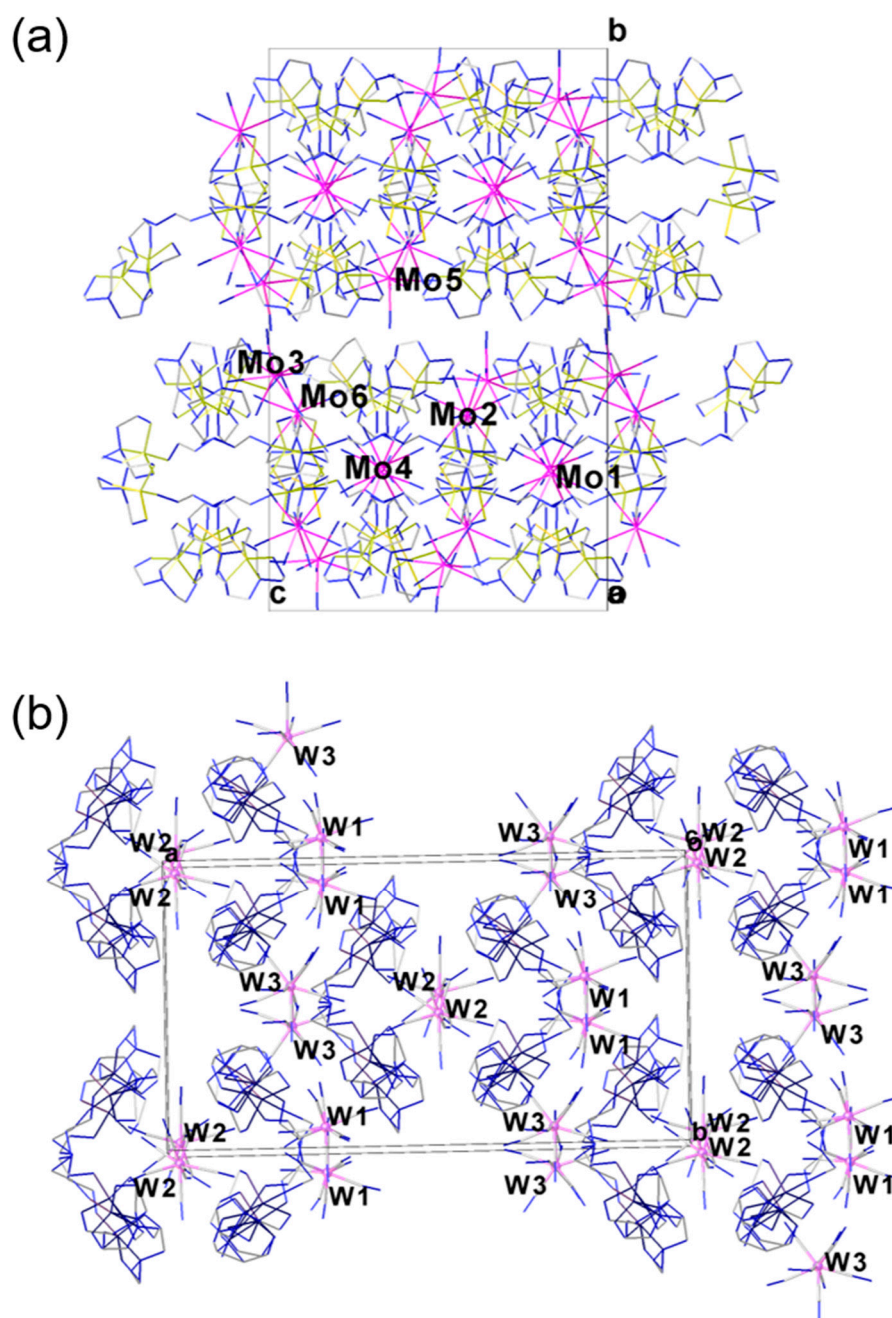

**Figure S4.** Packing diagrams of 1 (a) and 3 (b), where the solvent molecules and hydrogen atoms are omitted for clarity.



**Figure S5.** PXRD patterns for the three compounds.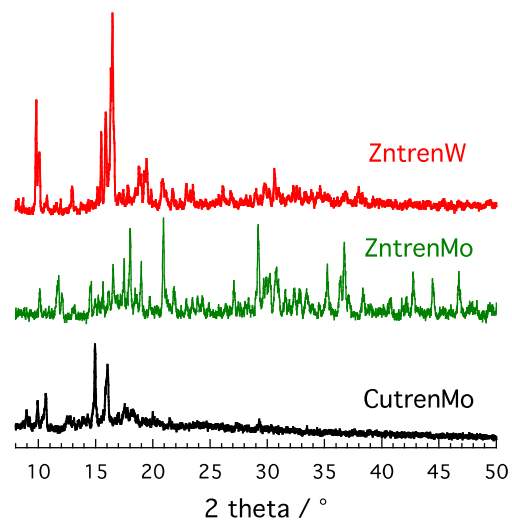**Experimental PXRD patterns compared with simulated ones from CIF.**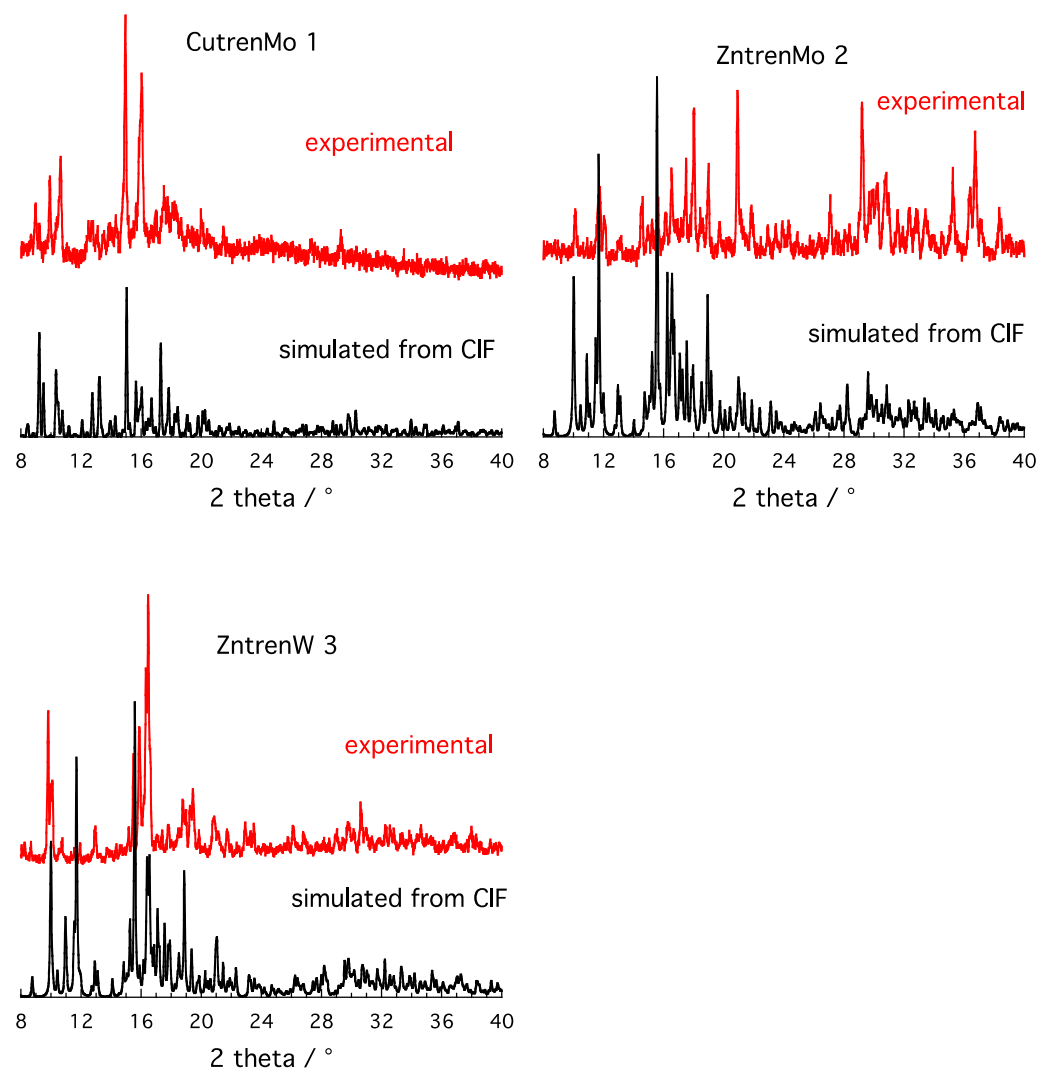

#### IV. Additional magnetic measurements.

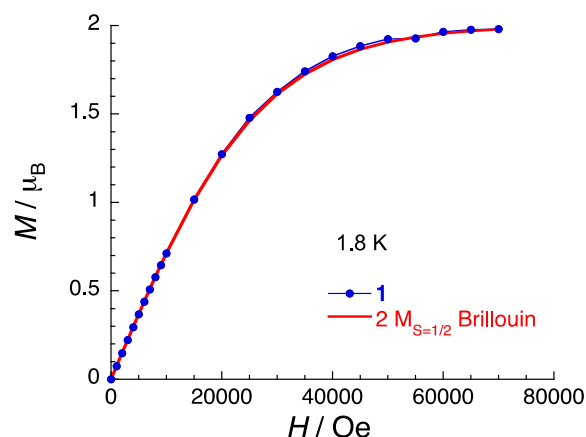

**Figure S6.** Fit of the magnetization of **1** at 1.8 K using Brillouin functions with  $g = 2$ .

#### References

1. Stefańczyk, O.; Ohkoshi, S.-i., Synthesis of Two-Dimensional Photomagnetic  $K_4\{[Cu^{II}(ida)]_2[M^{IV}(CN)_8]\} \cdot 4H_2O$  ( $M^{IV} = Mo, W$ ) ( $M^{IV} = Mo, W$ ) *Materials. Inorg. Chem.*, **2020**, *59*, 4292-4299.
2. Perumareddi, J. R.; Liehr, A.; Adamson, A. Ligand Field Theory of Transition Metal Cyanide Complexes. Part I. The Zero, One and Two Electron or Hole Configuration. *J. Am. Chem. Soc.*, **1963**, 249-259.
3. Duggan, M.; Ray, N.; Hataway, B.; Tomlison, G.; Brint, P.; Pelin, K. Crystal Structure and Electronic Properties of Ammine[tris(2-aminoethyl) amine]copper(II) Diperchlorate and Potassium Penta-amminecopper(II)Tris( hexaf luorophosphate) *J. S. C. Dalton.*, **1980**, 1342.
